# Supplementary material for: Synthesis and electrochemical studies of layer-structured metastable αI-LiVOPO4
Source: Royal Society of Chemistry journal article supplement (doi:10.1039/c2jm00062h), 2012-01-01
Supplement: c2jm00062h.pdf [file c2jm00062h.pdf]

# Synthesis and electrochemical studies of layer-structured metastable $\alpha_1$ -LiVPO<sub>4</sub>

A. Shahul Hameed,<sup>a</sup> Mangayarkarasi Nagarathinam,<sup>a</sup> M. V. Reddy,<sup>\*b</sup> B. V. R. Chowdari<sup>b</sup> and Jagadese J. Vittal<sup>\*\*ac</sup>

Received (in XXX, XXX) Xth XXXXXXXXX 20XX, Accepted Xth XXXXXXXXX 20XX  
DOI: 10.1039/b000000x

**Table S1** Crystallographic data and structure refinement details for LiVPO<sub>4</sub>·2H<sub>2</sub>O

|                                            |                                                   |
|--------------------------------------------|---------------------------------------------------|
| Formula                                    | H4 Li O7 P V                                      |
| Formula weight                             | 204.88                                            |
| T (K)                                      | 223(2)                                            |
| Crystal system                             | Orthorhombic                                      |
| Space group                                | Cmca                                              |
| Unit cell dimensions (Å)                   | a = 8.9454(7)<br>b = 9.0406(7)<br>c = 12.7473(10) |
| V/ Å <sup>3</sup>                          | 1030.90(14)                                       |
| Z                                          | 8                                                 |
| Density (calculated, g. cm <sup>-3</sup> ) | 2.640                                             |
| μ (mm <sup>-1</sup> )                      | 2.206                                             |
| Crystal size (mm <sup>3</sup> )            | 0.40 x 0.36 x 0.16                                |
| Theta range                                | 3.20 to 27.48°.                                   |
| Reflections collected                      | 3374                                              |
| Independent reflections                    | 633 [R(int) = 0.0230]                             |
| Absorption correction                      | Semi-empirical from equivalents                   |
| Max. and min. transmission                 | 0.7192 and 0.4724                                 |
| Refinement method                          | Full-matrix least-squares on F <sup>2</sup>       |
| Data / restraints / parameters             | 633 / 0 / 61                                      |
| Goodness-of-fit on F <sup>2</sup>          | 1.175                                             |
| Final R indices [I>2σ(I)]                  | R <sub>1</sub> = 0.0250, wR <sub>2</sub> = 0.0679 |
| R indices (all data)                       | R <sub>1</sub> = 0.0252, wR <sub>2</sub> = 0.0681 |
| Largest diff. peak and hole                | 0.261 and -0.718 e.Å <sup>-3</sup>                |

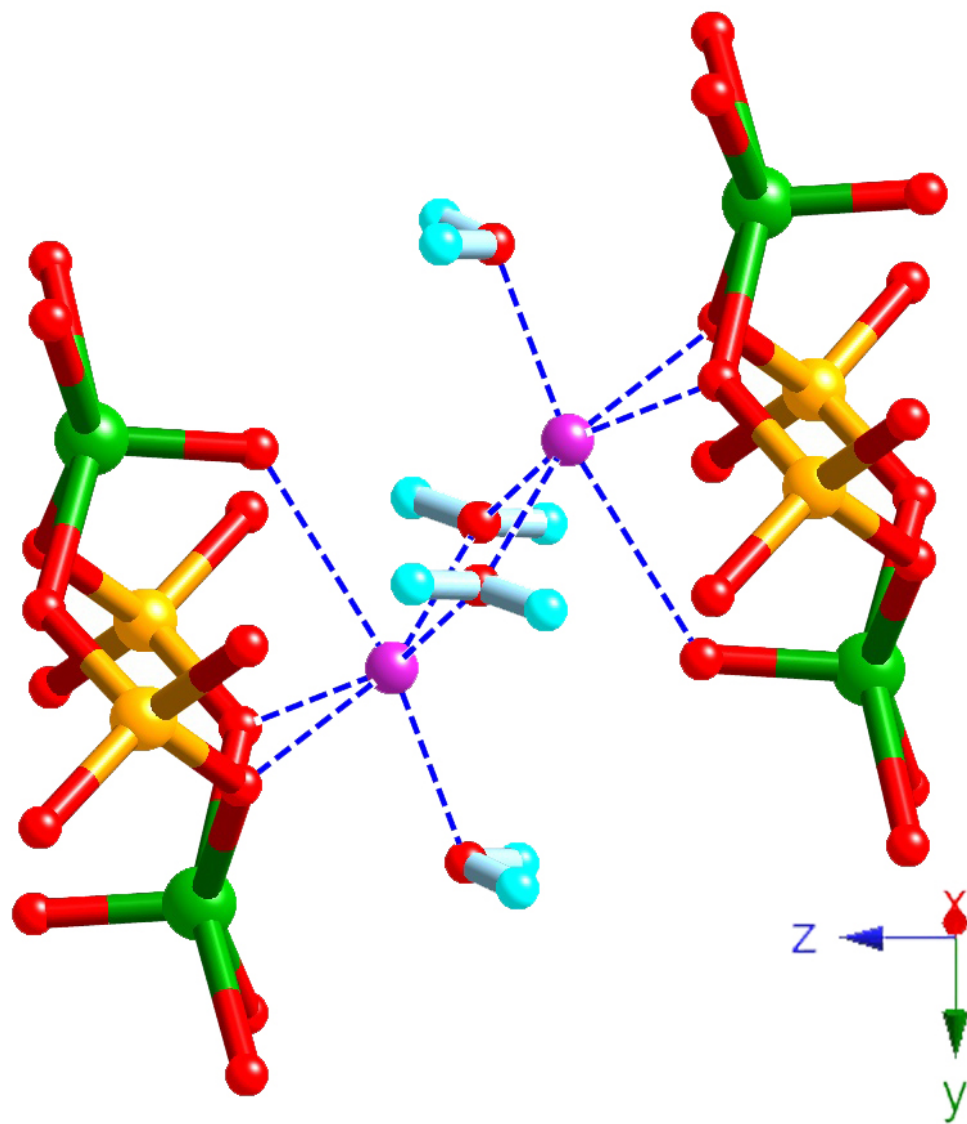

**Fig. S2** Crystal structure of  $\text{LiVOPO}_4 \cdot 2\text{H}_2\text{O}$  showing coordination of lithium with oxygen atoms. The V, P, O, H and Li atoms are shown in green, orange, red, blue and purple respectively.

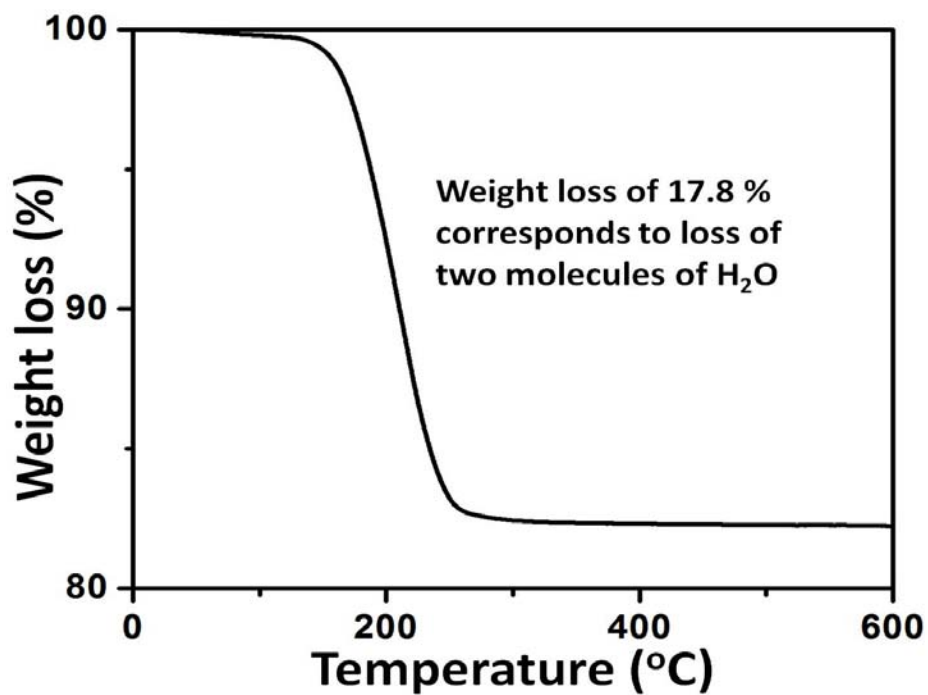

Fig. S3 TGA of  $\text{LiVOPO}_4 \cdot 2\text{H}_2\text{O}$  in air at a rate of  $5^\circ\text{C min}^{-1}$

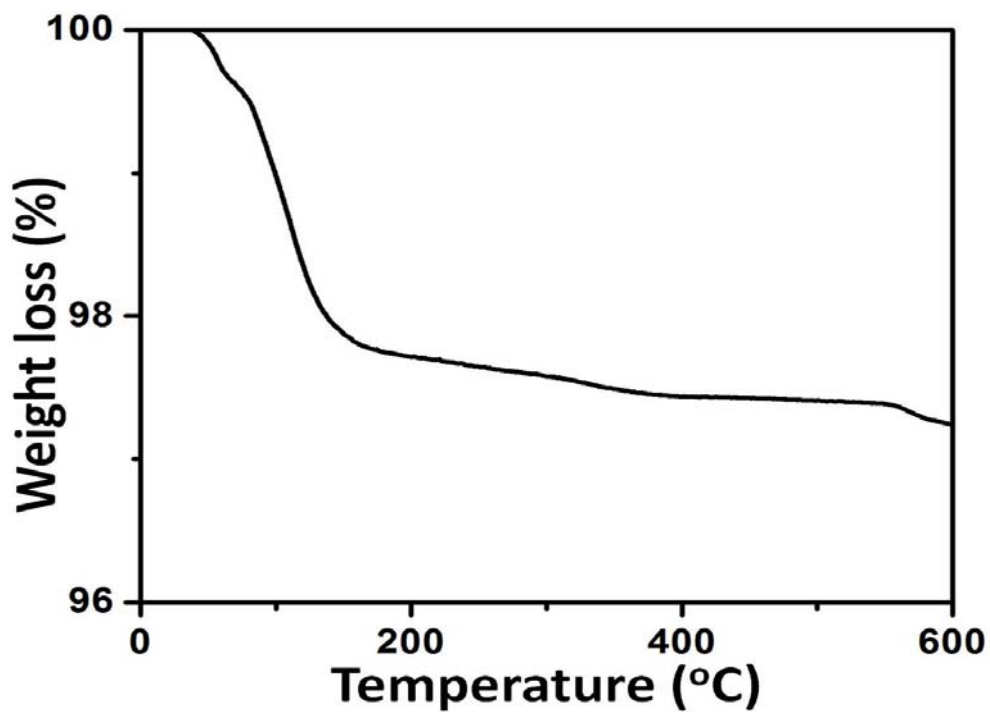

Fig. S4 TGA of compound obtained by dehydration of  $\text{LiVOPO}_4 \cdot 2\text{H}_2\text{O}$  in air at a rate of  $5^\circ\text{C min}^{-1}$

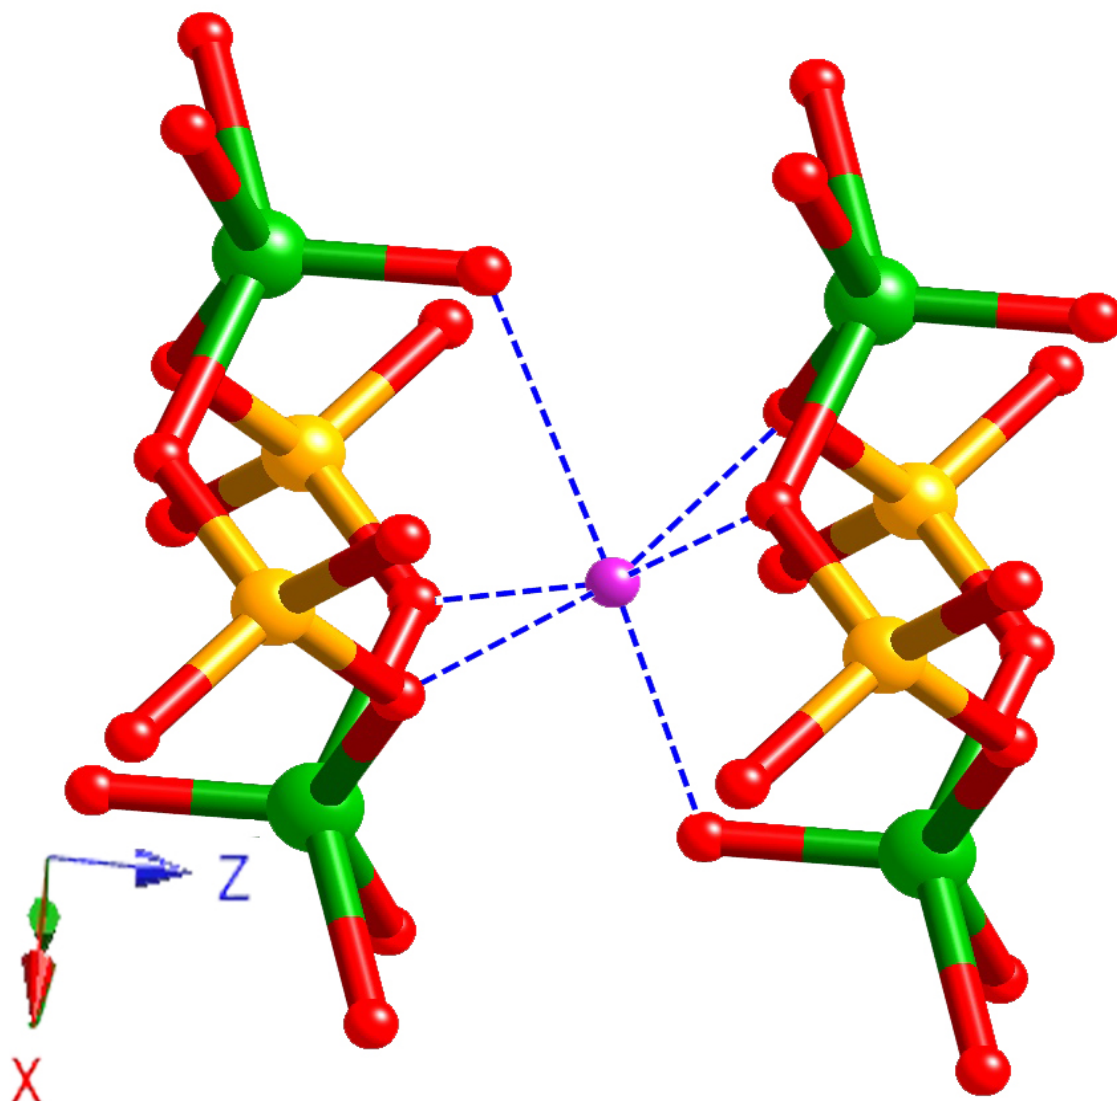

**Fig. S5** Crystal structure of  $\alpha_1$ -LiVOPO<sub>4</sub> showing coordination of lithium with oxygen atoms. The V, P, O and Li atoms are shown as green, orange, red and purple colored balls respectively.

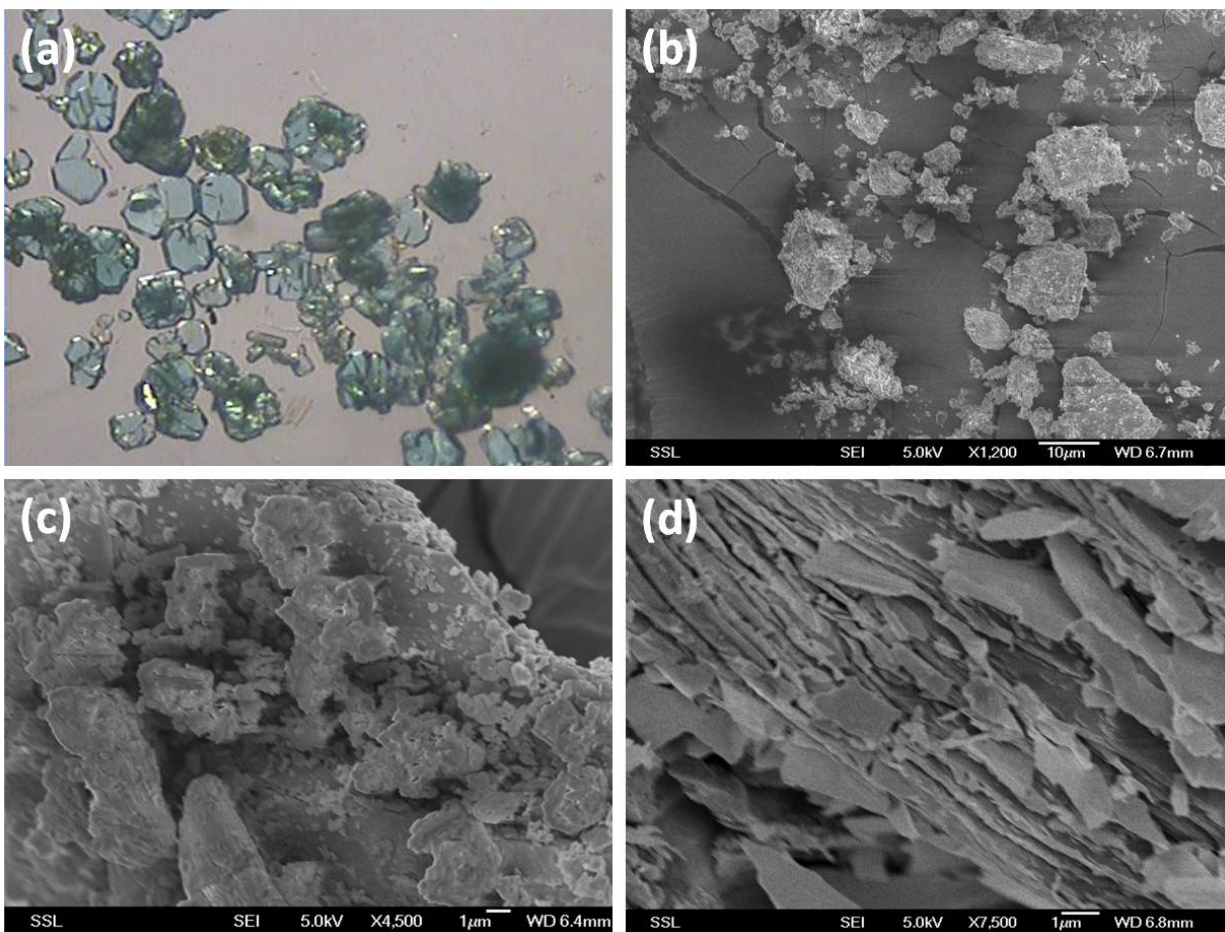

**Fig. S6.** SEM micrographs of (a) single crystals of  $\text{LiVOPO}_4 \cdot 2\text{H}_2\text{O}$ , (b) ball-milled  $\text{LiVOPO}_4 \cdot 2\text{H}_2\text{O}$ , (c)  $\alpha_1\text{-LiVOPO}_4$  obtained by dehydration of ball-milled  $\text{LiVOPO}_4 \cdot 2\text{H}_2\text{O}$  at low magnification and (d)  $\alpha_1\text{-LiVOPO}_4$  at high magnification

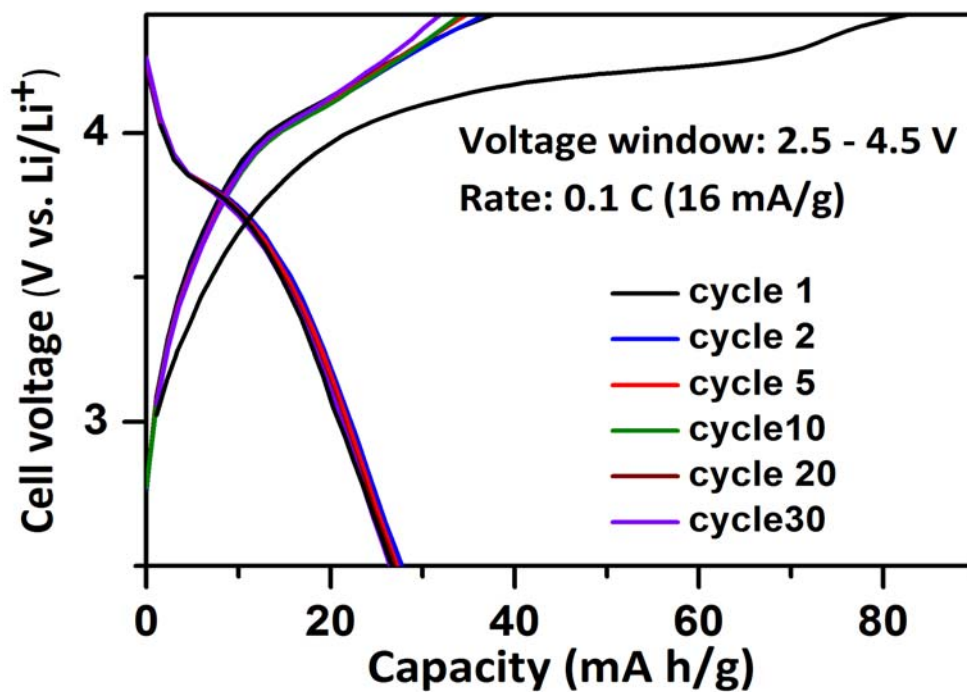

Fig. S7 Galvanostatic charge-discharge cycles of  $\alpha_I$ -LiVOPO<sub>4</sub> obtained from as synthesized LiVOPO<sub>4</sub>·2H<sub>2</sub>O

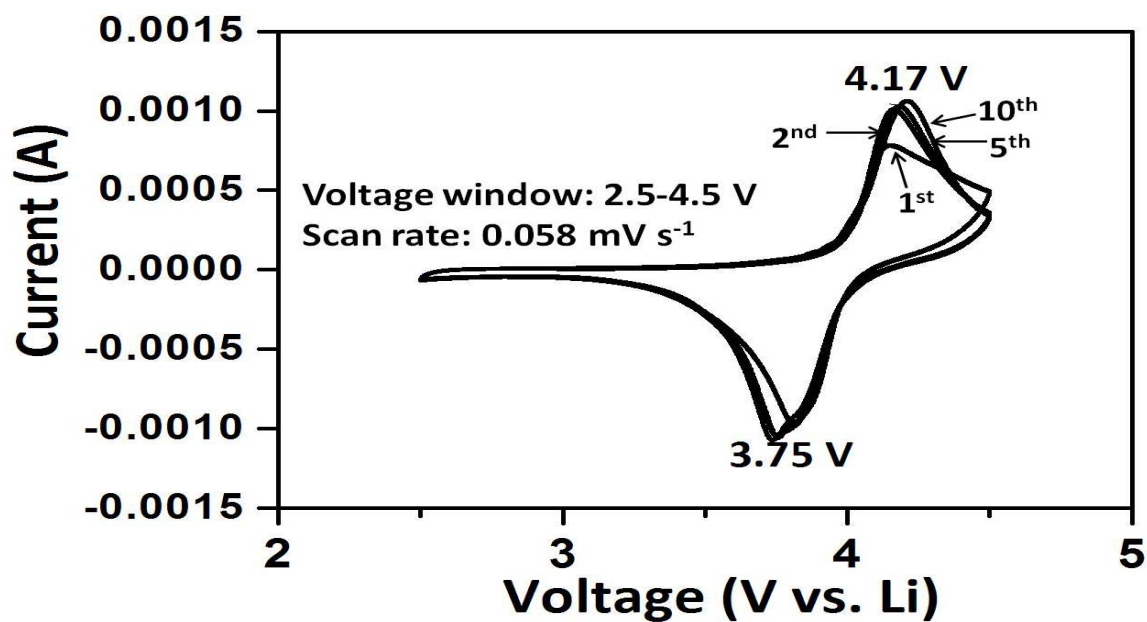

Fig. S8 Cyclic voltammograms of  $\alpha_I$ -LiVOPO<sub>4</sub> in the voltage window of 2.5-4.5 V at a scan rate of 0.058 mV s<sup>-1</sup>



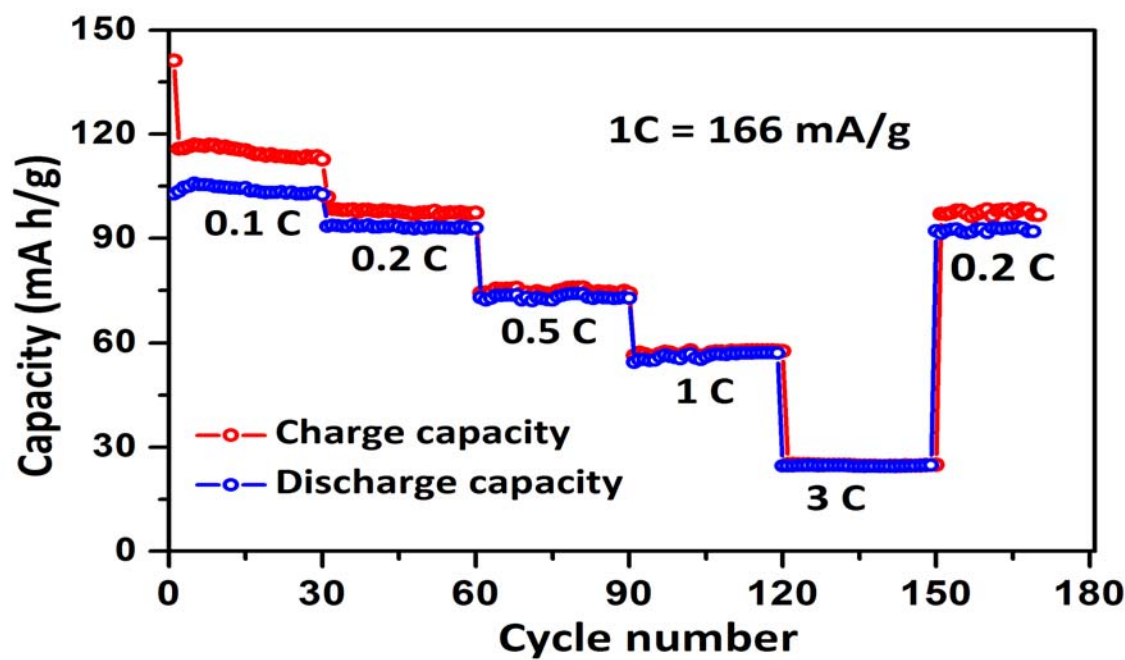

Fig. S9 Rate capability study of  $\alpha_1$ -LiVOPO<sub>4</sub> at various current rates
